# Supplementary material for: A solvent-directed stereoselective and electrocatalytic synthesis of diisoeugenol
Source: Royal Society of Chemistry journal article supplement (doi:10.1039/c8cc00794b), 2018-01-01
Supplement: c8cc00794b1.pdf [file c8cc00794b1.pdf]

Electronic Supplementary Information (ESI) for

## **Solvent-directed stereoselective and electrocatalytic synthesis of diisoeugenol**

Takashi Yamamoto,<sup>\*a</sup> Barbara Riehl,<sup>a,b</sup> Keisuke Naba,<sup>a</sup> Kenshin Nakahara,<sup>a</sup> Anton Wiebe,<sup>b</sup>  
Tsuyoshi Saitoh,<sup>c</sup> Siegfried R. Waldvogel,<sup>\*b</sup> Yasuaki Einaga,<sup>\*ad</sup>

<sup>a</sup> Department of Chemistry, Keio University, 3-14-1 Hiyoshi, Yokohama 223-8522, Japan

<sup>b</sup> Institut für Organische Chemie, Johannes Gutenberg-Universität Mainz, Duesbergweg 10-14,  
55128 Mainz, Germany

<sup>c</sup> International Institute for Integrative Sleep Medicine, University of Tsukuba, 1-1-1 Tennodai,  
Tsukuba 305-8575, Japan

<sup>d</sup> JST-ACCEL, 3-14-1 Hiyoshi, Yokohama 223-8522, Japan

E-mail: takayama@chem.keio.ac.jp (T.Y.); waldvogel@uni-mainz.de (S.R.W.);  
einaga@chem.keio.ac.jp (Y.E.)

### **Contents**

General Information

Protocol for Anodic Oxidation Reaction

GC-MS Chromatograms

NMR Spectra

## General Information

All reagents used were in analytical grade. A supporting electrolyte, *N*-methyl-*N,N,N*-tributylammonium methylsulfate (kindly provided by BASF SE, Ludwigshafen, Germany), were used. For the anodic oxidation reaction, a boron-doped diamond (BDD, 15  $\mu\text{m}$ -thick on a silicon substrate, DIACHEM™) was used, which was obtained from CONDIAS, Itzehoe, Germany.

Gas chromatography was performed with Shimadzu GC-2010 using HP 5 column (Agilent Technologies, USA; length: 30 m, inner diameter: 0.25 mm, film thickness: 0.25  $\mu\text{m}$ , carrier gas: hydrogen). GC-MS measurements were carried out with Shimadzu GCMS-QP2010 using Zebron ZB-5MSi column (Phenomenex, USA; length: 30 m, inner diameter: 0.25 mm, film thickness: 0.25  $\mu\text{m}$ , carrier gas: helium).

Analytical thin-layer chromatography was performed with Merck silica gel 60 F<sub>254</sub> precoated plate (0.25 mm). Flash column chromatography was performed with Biotage Isolera® equipped with Biotage SNAP Cartridge KP-Sil column and hexane/EtOAc as eluent.

<sup>1</sup>H NMR spectra were recorded by using JEOL JNM-ECX400. Chemical shifts ( $\delta$ ) are reported in parts per million (ppm) relative to tetramethylsilane ( $\delta$  0.00 ppm), as internal standard or traces of CHCl<sub>3</sub> in the corresponding deuterated solvent. ESI-MS spectra were obtained using Waters Mass Spectrometer-LCT Premier/XE.

## Protocol for Anodic Oxidation Reaction

Anodic oxidation reactions were performed with beaker-type Teflon cells (C. Gütz, B. Klöckner and S. R. Waldvogel, *Org. Process Res. Dev.* 2016, **20**, 26.). A solution of isoeugenol (0.76 mmol) and *N*-methyl-*N,N,N*-tributylammonium methylsulfate (0.14 g, 0.45 mmol) in 5 mL 1,1,1,3,3,3-hexafluoropropan-2-ol was transferred into the electrolysis cell equipped with BDD electrodes (0.3  $\times$  1.0  $\times$  7.0 cm; immersed 1.8 cm into solution). A constant current electrolysis (current density, *j*: 0.7–2.8 mA/cm<sup>2</sup>) was performed at 50 °C. After application of the desired electricity (*Q*: 0.2–1.0 F referring isoeugenol), the electrolysis was stopped, and solvent was removed *in vacuo*. The reaction mixture was analyzed by GC or GC-MS, in order to control progress of transformation. The crude product was purified by flash column chromatography as described above.

## GC-MS Chromatograms

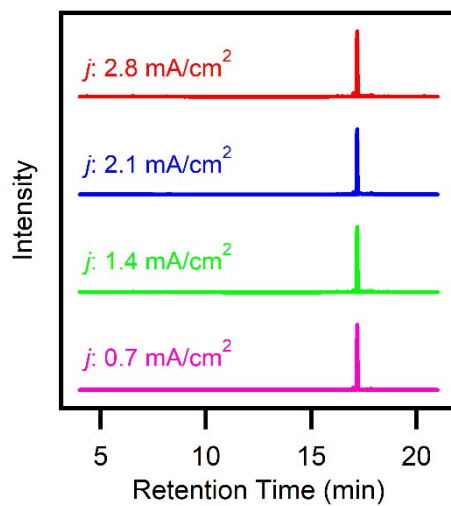

**Fig. S1** GC-MS chromatograms of the anodic oxidation of isoeugeol (1). The amount of electricity is fixed at 1.0 F referring 1.

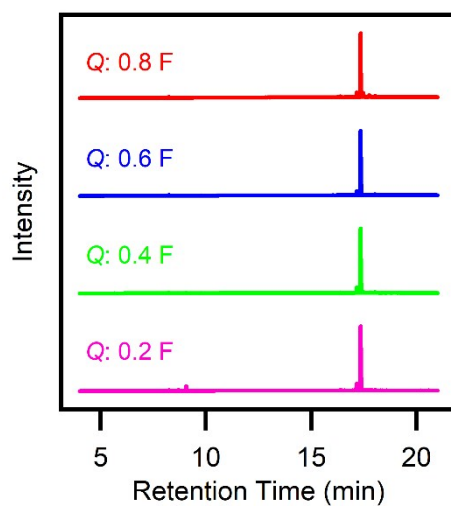

**Fig. S2** GC-MS chromatograms of the anodic oxidation of isoeugeol (1). The applied current density is fixed to 2.8 mA cm<sup>-2</sup>. The amount of electricity ( $Q$ ) is referring 1.

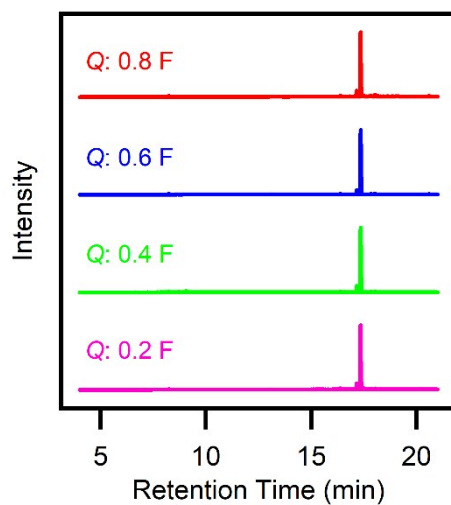

**Fig. S3** GC-MS chromatograms of the anodic oxidation of isoeugeol (**1**). The applied current density is fixed to 2.1 mA cm<sup>-2</sup>. The amount of electricity ( $Q$ ) is referring **1**.

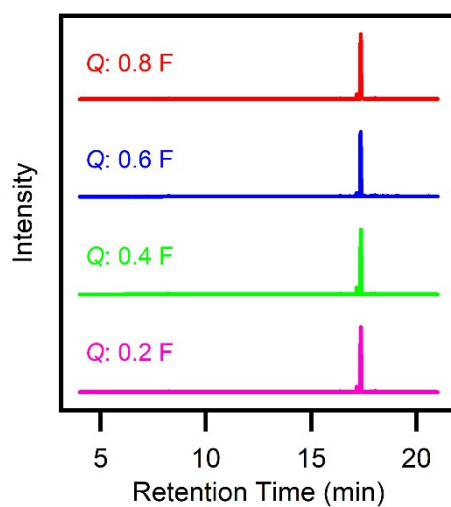

**Fig. S4** GC-MS chromatograms of the anodic oxidation of isoeugeol (**1**). The applied current density is fixed to 1.4 mA cm<sup>-2</sup>. The amount of electricity ( $Q$ ) is referring **1**.

## Experimental Results

**Table S1** Anodic conversion of isoeugenol (**1**) using glassy carbon / HFIP system.

| Entry <sup>[a]</sup> | $j^{[b]}$<br>(mA cm <sup>-2</sup> ) | $Q^{[c]}$<br>(F) | <b>2</b> <sup>[d]</sup> |
|----------------------|-------------------------------------|------------------|-------------------------|
| 1                    | 0.7                                 | 0.2              | 45                      |
| 2                    | 0.7                                 | 1.0              | 31                      |
| 3                    | 1.4                                 | 0.2              | 42                      |
| 4                    | 1.4                                 | 1.0              | 29                      |
| 5                    | 2.1                                 | 0.2              | 38                      |
| 6                    | 2.1                                 | 1.0              | 21                      |
| 7                    | 2.8                                 | 0.2              | 34                      |
| 8                    | 2.8                                 | 1.0              | 16                      |

[a] Reaction conditions: glassy carbon anode and cathode, 5 mL HFIP, 0.09 M *N*-methyl-*N,N,N*-tributylammonium methylsulfate, undivided beaker-type cell, 50 °C.

[b] Current density.

[c] Amount of charge referring **1**.

[d] Isolated yield.

## NMR Spectra

### **$\alpha$ -Diisoeugenol (2)**

A colorless solid (m.p. 179–180 °C).

$^1\text{H}$  NMR (400 MHz,  $\text{CDCl}_3$ )  $\delta$  [ppm]: 6.84 (d,  $J = 8.0$  Hz, 1H), 6.77 (s, 1H), 6.65 (dd,  $J = 8.0, 1.9$  Hz, 1H), 6.61 (d,  $J = 1.9$  Hz, 1H), 6.48 (d,  $J = 1.0$  Hz, 1H), 5.51 (s, 1H), 5.47 (s, 1H), 3.90 (s, 3H), 3.82 (s, 3H), 3.73 (d,  $J = 9.5$  Hz, 1H), 2.91 (ddd,  $J = 9.5, 7.4, 5.4$  Hz, 1H), 2.46 (dp,  $J = 9.5, 7.0$  Hz, 1H), 1.78–1.63 (m, 1H), 1.46–1.29 (m, 1H), 1.03 (d,  $J = 7.0$  Hz, 3H), 0.97 (t,  $J = 7.4$  Hz, 3H).

$^{13}\text{C}$  NMR (101 MHz,  $\text{CDCl}_3$ )  $\delta$  [ppm]: 146.27, 144.95, 144.33, 143.90, 138.97, 138.55, 135.66, 121.32, 113.79, 110.80, 110.42, 107.29, 56.55, 55.98, 55.75, 49.07, 48.34, 22.21, 13.64, 12.08.

HR-MS (ESI+):  $m/z$  calcd for  $\text{C}_{20}\text{H}_{24}\text{O}_4\text{Na}$  [ $\text{M} + \text{Na}$ ] $^+$ , 351.1572; found 351.1572

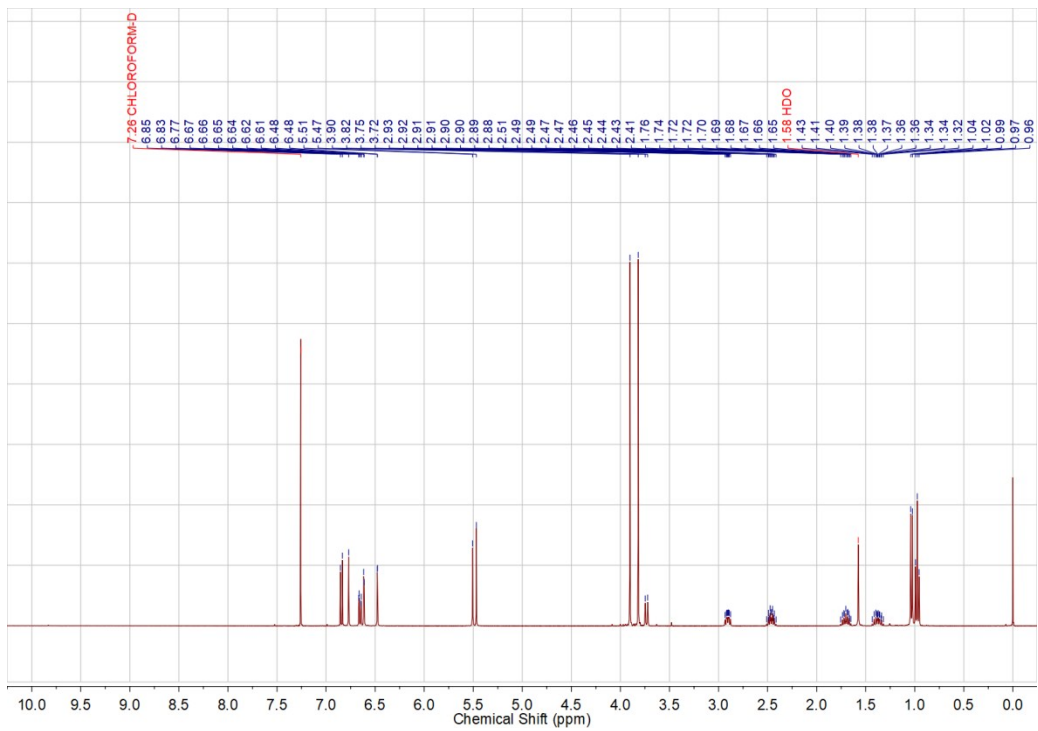

Fig. S5 The  $^1\text{H}$  NMR spectrum of  $\alpha$ -diisoeugenol (**2**).

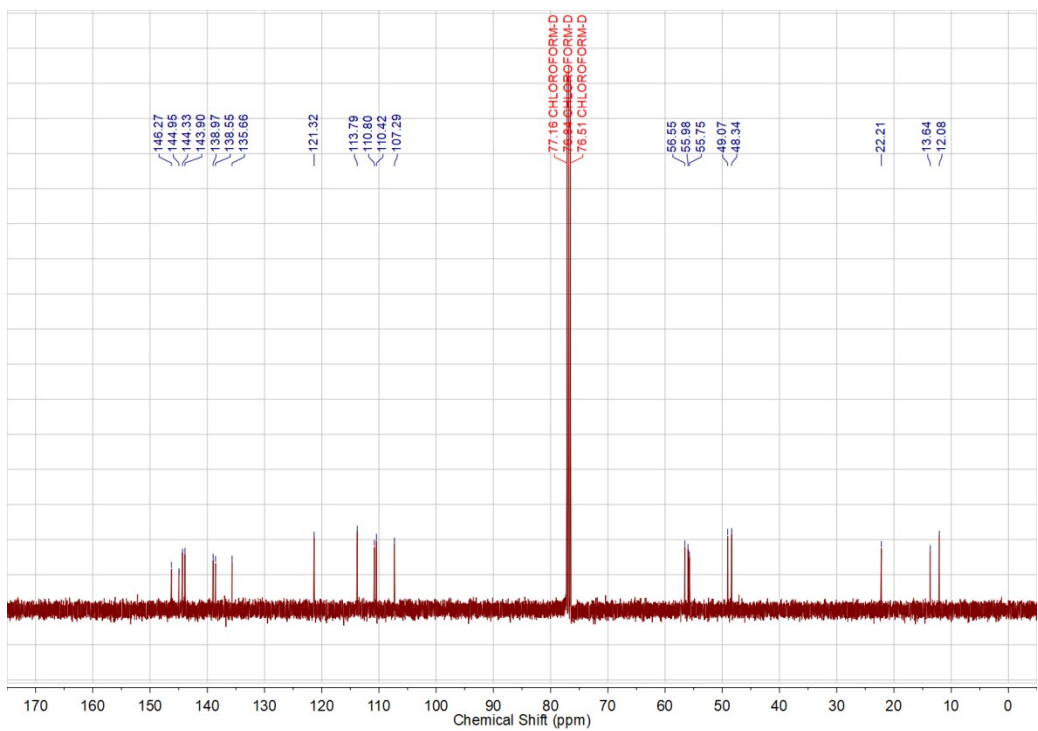

**Fig. S6** The  $^{13}\text{C}$  NMR spectrum of  $\alpha$ -diisoeugeol (**2**).
